# Supplementary material for: Prostate cancer ETS rearrangements switch a cell migration gene expression program from RAS/ERK to PI3K/AKT regulation
Source: PubMed Central journal article supplement (PMC3999933; doi:10.1186/1476-4598-13-61), 2014-03-19
Supplement: 1476-4598-13-61-S4.pdf [file 1476-4598-13-61-S4.pdf]

**Table S1****Primer sequences used<sup>a</sup>**

|                                             |                                                                              |
|---------------------------------------------|------------------------------------------------------------------------------|
| RT-PCR SMAD3 forward                        | GCAGAACGTCAACACCAAGTGC                                                       |
| RT-PCR SMAD3 reverse                        | GTGCAGGTCTGGCCATCGC                                                          |
| RT PCR SMAD3 reverse transcription          | CGTCCTTCTTCATATTGAAGGCG                                                      |
| RT-PCR ARHGAP29 forward                     | GGAATCAGAACGCAAGCAAAATGCG                                                    |
| RT-PCR ARHGAP29 reverse                     | GGGATGCTGATTCAGCCTCTTGG                                                      |
| RT-PCR mTOR forward                         | CTAAGTCTACCACGACAGCCCGG                                                      |
| RT-PCR mTOR reverse                         | GGCCTTCATGCCACATCTCATGCC                                                     |
| RT-PCR Rictor forward                       | CAACTGGGATGCTGTGAGGCATAG                                                     |
| RT-PCR Rictor reverse                       | GTA TAGTAGAGCTGCTGCCAAAC                                                     |
| RT-PCR Raptor forward                       | GAGAAGCTCTACAGCCTCCTCTCC                                                     |
| RT-PCR Raptor reverse                       | CCGTCCTCTCTGCAGAGTTGCC                                                       |
| Reporter cloning, 3x ETS/AP-1 forward       | CTAGCCACGGCCC <b>AGGAAGTGACTCACTAGCAGGAA<br/>GTGACTCAAGCTCAGGAAGTGACTCAC</b> |
| Reporter cloning, 3x ETS/AP-1 5' reverse    | AGCTGTGAGTCACTTCTGAGCTTGAGTCACTTCTG<br>CTAGTGAGTCACTTCTGGGCCGTGG             |
| Reporter cloning, 3x ETS mt/AP-1 forward    | CTAGCCACGGCCC <b>AGagAGTGACTCACTAGCAGagAG<br/>TGACTCAAGCTCAGagAGTGACTCAC</b> |
| Reporter cloning, 3x ETS mt/AP-1 reverse    | AGCTGTGAGTCACTctCTGAGCTTGAGTCACTctCTGCT<br>AGTGAGTCACTctCTGGGCCGTGG          |
| Reporter cloning, 3x ETS/AP-1 mt forward    | CTAGCCACGGCCC <b>AGGAAGTagCctACTAGCAGGAAG<br/>TagCctAAGCTCAGGAAGTagCctAC</b> |
| Reporter cloning, 3x ETS/AP-1 mt reverse    | AGCTGTagGctACTTCTGAGCTTtagGctACTTCTGCTA<br>GTagGctACTTCTGGGCCGTGG            |
| Reporter cloning, 3x ETS mt/AP-1 mt forward | CTAGCCACGGCCC <b>AGagAGTagCctACTAGCAGagAGT<br/>agCctAAGCTCAGagAGTagCctAC</b> |
| Reporter cloning, 3x ETS mt/AP-1 mt reverse | AGCTGTagGctACTctCTGAGCTTtagGctACTctCTGCTAGT<br>agGctACTctCTGGGCCGTGG         |

<sup>a</sup> All sequences are listed in 5' to 3' direction, reverse PCR primers were used for reverse transcription, except for SMAD3.
